# Supplementary material
Source: PubMed Central journal article supplement (PMC3609928)
Supplement: NIHMS444615-supplement-1_si_001.pdf [file NIHMS444615-supplement-1_si_001.pdf]

## Reduction of Nanoparticle Avidity Enhances the Selectivity of Vascular Targeting and PET Detection of Pulmonary Inflammation

Blaine J. Zern<sup>1,2</sup>, Ann-Marie Chacko<sup>2,3</sup>, Jin Liu<sup>6</sup>, Colin F. Greineder<sup>1,2,4</sup>, Eric R. Blankemeyer<sup>3</sup>, Ravi Radhakrishnan<sup>5</sup>, Vladimir Muzykantov<sup>1,2\*</sup>

<sup>1</sup>Department of Pharmacology, <sup>2</sup>Center for Targeted Therapeutics and Translational Nanomedicine, Institute for Translational Medicine and Therapeutics, <sup>3</sup>Department of Radiology, <sup>4</sup>Department of Emergency Medicine, Perelman School of Medicine and <sup>5</sup>Department of Bioengineering University of Pennsylvania, Philadelphia, PA 19104, <sup>6</sup>School of Mechanical and Materials Engineering, Washington State University, Pullman, WA 99164

\*Address correspondence to: muzykant@mail.med.upenn.edu

### Supporting Information:

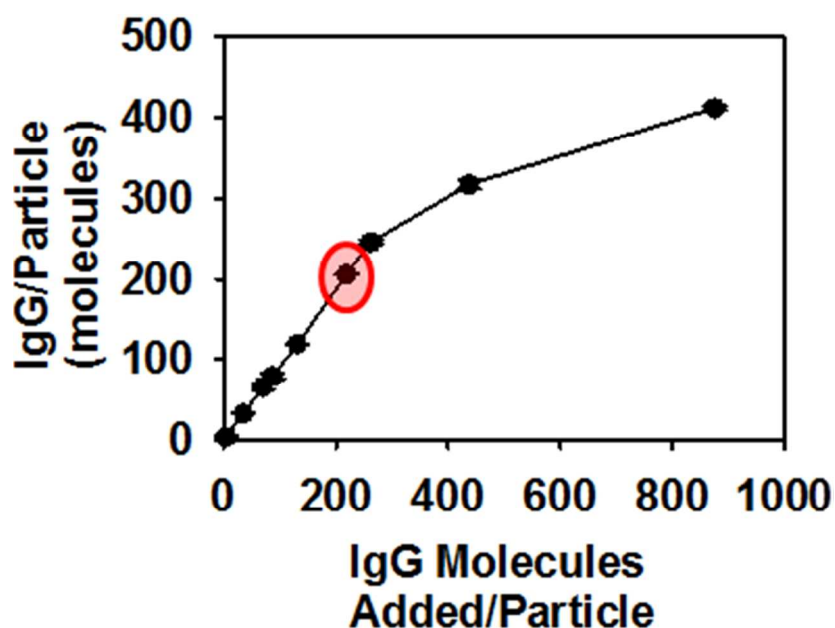

**Fig. S1.** Antibody coverage analysis of NPs. [<sup>125</sup>I]IgG adsorbed onto NPs was calculated as the number of IgG molecules adsorbed per NP as a function of the number of IgG molecules added to NPs. Full coating (~200 Ab/NP, highlighted in red) denotes theoretical saturating coverage.

**TABLE S1. Characterization of aICAM-NP<sup>a</sup>**

|           | <b><math>D_{avg}</math> (nm)</b> | <b>Polydispersity (PD)</b> |
|-----------|----------------------------------|----------------------------|
| IgG NP    | 187 ± 8                          | 0.17                       |
| 5 Ab/NP   | 183 ± 6                          | 0.11                       |
| 50 Ab/NP  | 186 ± 7                          | 0.12                       |
| 100 Ab/NP | 192 ± 7                          | 0.18                       |
| 200 Ab/NP | 198 ± 9                          | 0.19                       |

<sup>a</sup>Average hydrodynamic radius,  $D_{avg}$  and PD for anti-ICAM-1/NP were determined by DLS

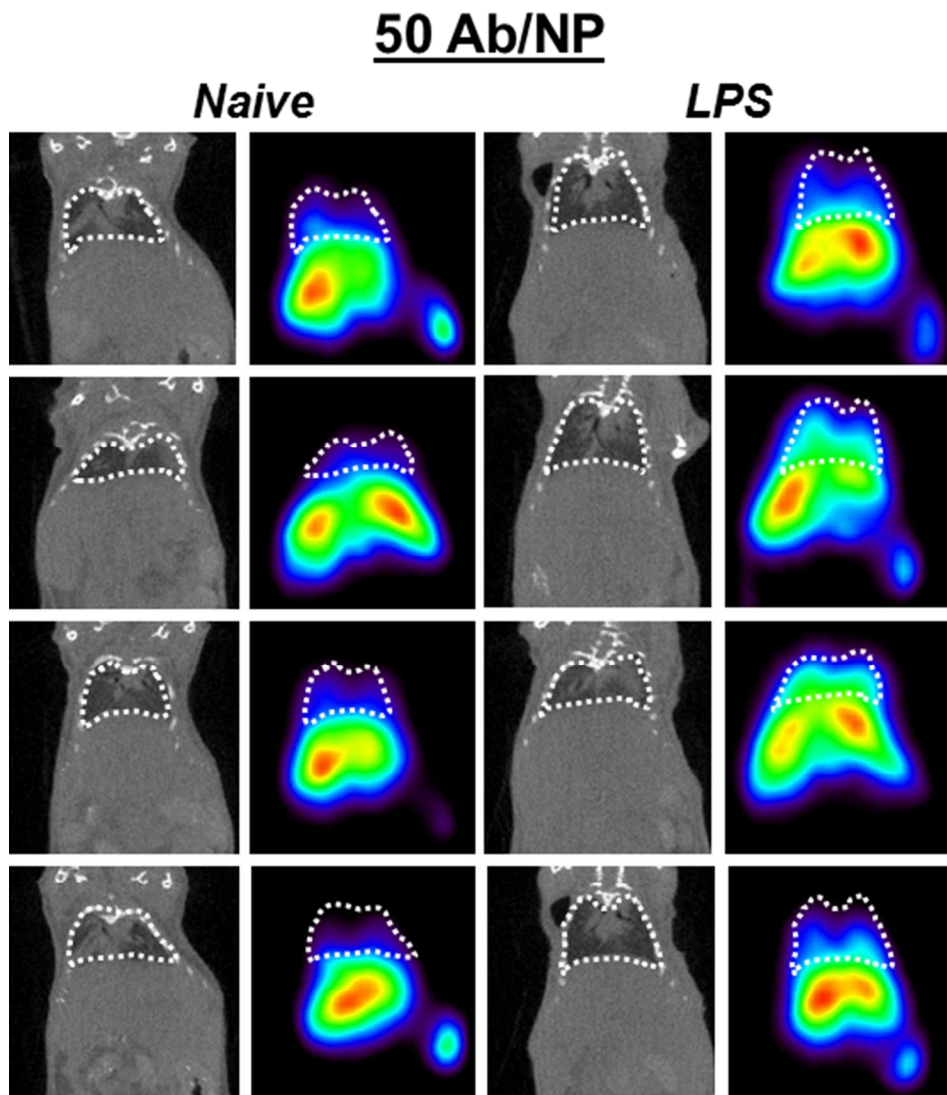

**Fig. S2.** Coronal sections of real-time *in vivo* CT and PET images acquired after administration of ICAM-1-targeted [<sup>124</sup>I]-NP (50 Ab/NP) in naïve and LPS-challenged mice. Each animal is a 1 h summed PET image overlaid with an anatomical CT scan for a total of n=4 for each group.

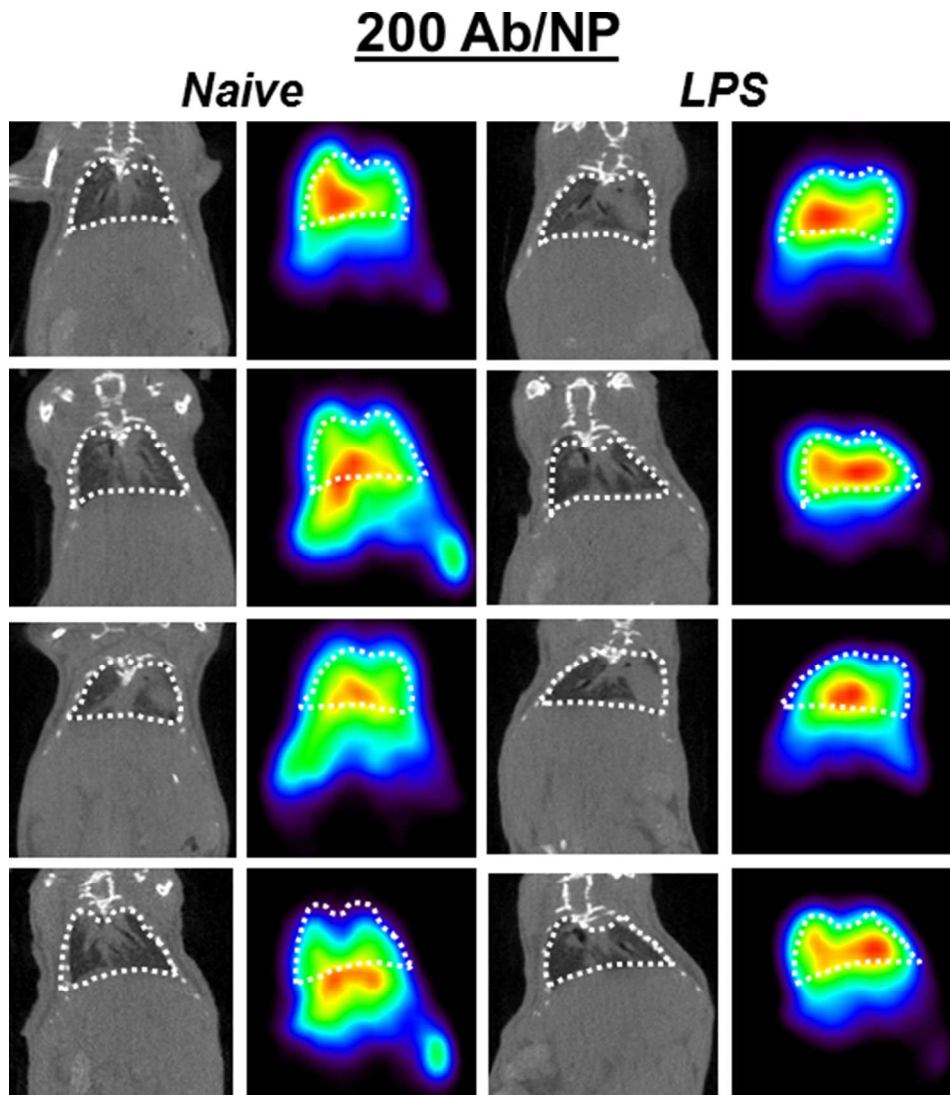

**Fig. S3.** Coronal sections of real-time *in vivo* CT and PET images acquired after administration of ICAM-1-targeted [ $^{124}$ I]-NP (200 Ab/NP) in naïve and LPS-challenged mice. Each animal is a 1 h summed PET image overlaid with an anatomical CT scan for a total of n=4 for each group.

## IgG/NP-LPS

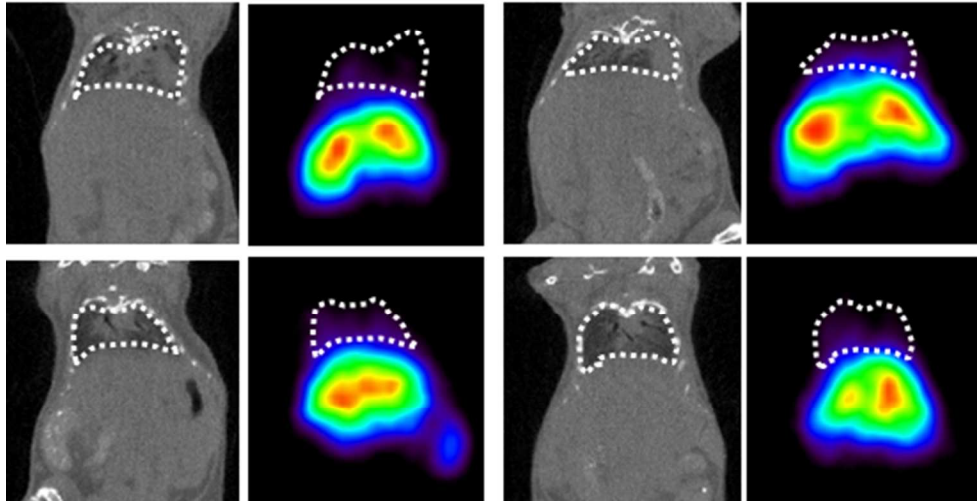

**Fig. S4.** Coronal sections of real-time *in vivo* CT and PET images acquired after administration of IgG-control [ $^{124}$ I]-NP (200 Ab/NP) in LPS-challenged mice. Each animal is a 1 h summed PET image overlaid with an anatomical CT scan for a total of n=4 for each group.
